# Supplementary material for: Determining chemical exchange rates of the uracil labile protons by NMR diffusion experiments
Source: Royal Society of Chemistry journal article supplement (doi:10.1039/b513580j), 2005-11-16
Supplement: b513580j.pdf [file b513580j.pdf]

## Supplementary figures

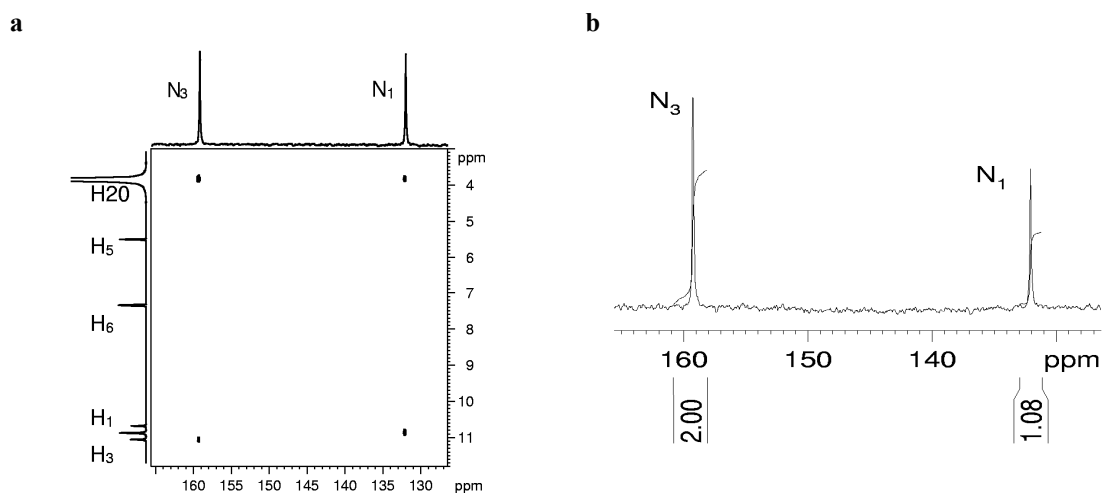

**Figure A1.** (a) 500 MHz  $^1\text{H}$ - $^{15}\text{N}$  HOESY spectrum of  $^{15}\text{N}$ -enriched uracil recorded in a mixture of  $\text{DMSO-}d_6$ : $\text{H}_2\text{O}$  (5:1, vol.) at 300 K with a mixing time of 100 ms. The top and left 1D projections show the  $^{15}\text{N}$  and  $^1\text{H}$  spectra, respectively. (b) F2 trace along the water  $^1\text{H}$  chemical shift showing that the  $\text{N}_3$ -water cross-peak is twice as intense as the  $\text{N}_1$ -water cross-peak.

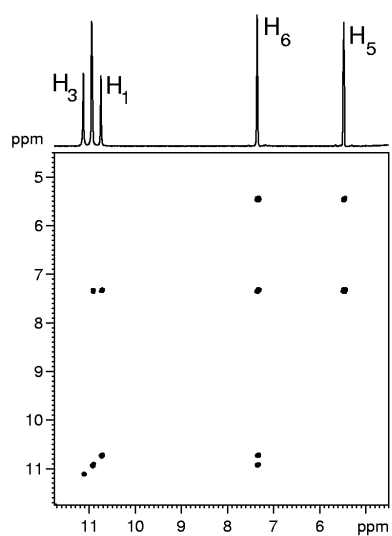

**Figure A2.** 500 MHz  $^1\text{H}$ - $^1\text{H}$  COSY spectrum of  $^{15}\text{N}$ -enriched uracil recorded in a mixture of  $\text{DMSO-}d_6$ : $\text{H}_2\text{O}$  (5:1, vol.) at 300 K. The  $^1\text{H}$  spectrum, shown as the 1D projection, can easily be assigned from the observed cross-peaks.

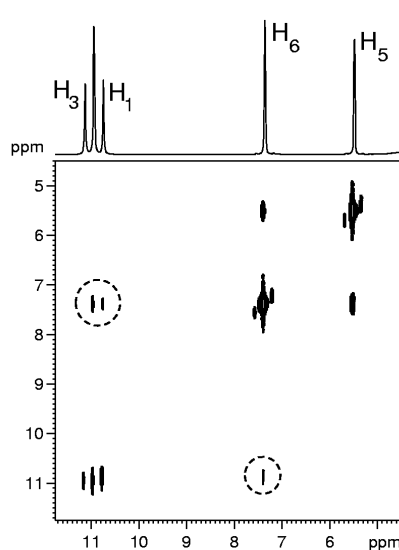

**Figure A3.** 500 MHz  $^1\text{H}$ - $^1\text{H}$  NOESY spectrum of  $^{15}\text{N}$ -enriched uracil recorded in a mixture of  $\text{DMSO-}d_6$ : $\text{H}_2\text{O}$  (5:1, vol.) at 300 K with a mixing time of 500 ms. The  $^1\text{H}$  spectrum is shown as the 1D projection. The dashed circles evidence the NOE cross-peak between  $\text{H}_6$  and  $\text{H}_1$ , hereby confirming the spectral assignment.
